# Supplementary material for: Zika Virus Antagonizes Type I Interferon Responses during Infection of Human Dendritic Cells
Source: PubMed Central journal article supplement (PMC5289613; doi:10.1371/journal.ppat.1006164), 2017-02-02
Supplement: ppat.1006164.s007.pdf [file ppat.1006164.s007.pdf]

S1 Table

Zika virus strain information

|                  | <b>PR-2015</b> | <b>P6-1966</b> | <b>MR-1947</b> | <b>Dak-1984</b>      |
|------------------|----------------|----------------|----------------|----------------------|
| <b>Strain</b>    | PRVABC59       | P6-740         | MR766          | DakAr 41524          |
| <b>Accession</b> | KX601168       | KX601167       | KX601169       | KX601166             |
| <b>Lineage</b>   | Asian          | Asian          | East African   | West African         |
| <b>Country</b>   | Puerto Rico    | Malaysia       | Uganda         | Senegal              |
| <b>Date</b>      | 2015           | 1966           | 1947           | 1984                 |
| <b>Passages</b>  | V(4)           | SM(6), V(3)    | SM(149), V(3)  | Ap61(1), C6(1), V(1) |

Nucleotide similarity of the CDS between strains

|                 | <b>PR-2015</b> | <b>P6-1966</b> | <b>MR-1947</b> | <b>Dak-1984</b> |
|-----------------|----------------|----------------|----------------|-----------------|
| <b>PR-2015</b>  | 100            | 95.5           | 88.6           | 88.6            |
| <b>P6-1966</b>  | 95.5           | 100            | 89.9           | 89.9            |
| <b>MR-1947</b>  | 88.6           | 89.9           | 100            | 93.4            |
| <b>Dak-1984</b> | 88.6           | 89.9           | 93.4           | 100             |

Amino acid changes as compared to PR-2015

| <b>Protein</b>        | <b>Total AAs</b> | <b>P6-1966</b>      |                  | <b>MR-1947</b>      |                  | <b>Dak-1984</b>     |                  |
|-----------------------|------------------|---------------------|------------------|---------------------|------------------|---------------------|------------------|
|                       |                  | <b># of changes</b> | <b>% changes</b> | <b># of changes</b> | <b>% changes</b> | <b># of changes</b> | <b>% changes</b> |
| <b>ancC</b>           | <b>122</b>       | 1                   | 0.8%             | 6                   | 4.9%             | 5                   | 4.1%             |
| <b>C</b>              | <b>104</b>       | 1                   | 1.0%             | 4                   | 3.8%             | 4                   | 3.8%             |
| <b>anc</b>            | <b>18</b>        | 0                   | 0.0%             | 2                   | 11.1%            | 1                   | 5.6%             |
| <b>preM</b>           | <b>168</b>       | 2                   | 1.2%             | 10                  | 6.0%             | 10                  | 6.0%             |
| <b>pr</b>             | <b>93</b>        | 2                   | 2.2%             | 7                   | 7.5%             | 7                   | 7.5%             |
| <b>M</b>              | <b>75</b>        | 0                   | 0.0%             | 3                   | 4.0%             | 3                   | 4.0%             |
| <b>E</b>              | <b>504</b>       | 6                   | 1.2%             | 19                  | 3.8%             | 11                  | 2.2%             |
| <b>NS1</b>            | <b>352</b>       | 2                   | 0.6%             | 9                   | 2.6%             | 7                   | 2.0%             |
| <b>NS2A</b>           | <b>226</b>       | 2                   | 0.9%             | 9                   | 4.0%             | 10                  | 4.4%             |
| <b>NS2B</b>           | <b>130</b>       | 0                   | 0.0%             | 2                   | 1.5%             | 2                   | 1.5%             |
| <b>NS3</b>            | <b>617</b>       | 3                   | 0.5%             | 10                  | 1.6%             | 13                  | 2.1%             |
| <b>NS4A</b>           | <b>127</b>       | 0                   | 0.0%             | 1                   | 0.8%             | 2                   | 1.6%             |
| <b>2K</b>             | <b>23</b>        | 0                   | 0.0%             | 0                   | 0.0%             | 0                   | 0.0%             |
| <b>NS4B</b>           | <b>251</b>       | 7                   | 2.8%             | 10                  | 4.0%             | 9                   | 3.6%             |
| <b>NS5</b>            | <b>903</b>       | 16                  | 1.8%             | 35                  | 3.9%             | 35                  | 3.9%             |
| <b>Structural</b>     | <b>794</b>       | 9                   | 1.1%             | 35                  | 4.4%             | 26                  | 3.3%             |
| <b>Non-structural</b> | <b>2629</b>      | 30                  | 1.1%             | 76                  | 2.9%             | 78                  | 3.0%             |
| <b>Polyprotein</b>    | <b>3423</b>      | 39                  | 1.1%             | 111                 | 3.2%             | 104                 | 3.0%             |
