# Supplementary material for: Zika Virus Antagonizes Type I Interferon Responses during Infection of Human Dendritic Cells
Source: PubMed Central journal article supplement (PMC5289613; doi:10.1371/journal.ppat.1006164), 2017-02-02
Supplement: ppat.1006164.s008.pdf [file ppat.1006164.s008.pdf]

S2 Table

|                                 | moDCs |        |        |               |        |         |        |         |        |         |        |          |        |
|---------------------------------|-------|--------|--------|---------------|--------|---------|--------|---------|--------|---------|--------|----------|--------|
|                                 | LLOQ  | Mock   |        | RIG-I Agonist |        | PR-2015 |        | P6-1966 |        | MR-1947 |        | Dak-1984 |        |
|                                 |       | Mean   | SD     | Mean          | SD     | Mean    | SD     | Mean    | SD     | Mean    | SD     | Mean     | SD     |
| <b>IL-1<math>\beta</math></b>   | 5     | ND     | ND     | ND            | ND     | ND      | ND     | ND      | ND     | ND      | ND     | ND       | ND     |
| <b>IL-10</b>                    | 1     | ND     | ND     | 11.1          | 6.7    | ND      | ND     | 7.1     | 5.8    | 6.5     | 6.9    | 5.4      | 5.9    |
| <b>IL-13</b>                    | 0.5   | 3.2    | 0.7    | 2.5           | 0.7    | 3.5     | 0.6    | 1.7     | 0.4    | 1.9     | 0.3    | 1.5      | 0.4    |
| <b>IL-6</b>                     | 0.5   | 16.3   | 10.8   | 263.3         | 162.6  | 24.8    | 12.0   | 142.5   | 69.3   | 51.4    | 44.7   | 47.8     | 40.9   |
| <b>IL-12</b>                    | 5     | 11.1   | 12.2   | 45.9          | 6.8    | 32.2    | 69.0   | 50.8    | 60.7   | 27.7    | 31.4   | 24.0     | 25.3   |
| <b>RANTES</b>                   | 10    | 8.7    | 1.0    | 338.8         | 148.2  | 8.9     | 1.0    | 10.4    | 4.1    | 8.8     | 1.2    | 8.6      | 1.2    |
| <b>Eotaxin</b>                  | 0.5   | ND     | ND     | ND            | ND     | ND      | ND     | ND      | ND     | ND      | ND     | ND       | ND     |
| <b>IL-17</b>                    | 5     | ND     | ND     | ND            | ND     | ND      | ND     | ND      | ND     | ND      | ND     | ND       | ND     |
| <b>MIP-1<math>\alpha</math></b> | 5     | 215.4  | 273.0  | 4505.2        | 1515.9 | 156.4   | 178.4  | 230.8   | 191.1  | 231.4   | 283.5  | 211.5    | 250.2  |
| <b>GM-CSF</b>                   | 0.5   | ND     | ND     | 1145.0        | 692.9  | ND      | ND     | ND      | ND     | ND      | ND     | ND       | ND     |
| <b>MIP-1<math>\beta</math></b>  | 5     | 227.2  | 136.1  | 3776.5        | 2074.6 | 158.6   | 68.2   | 164.1   | 84.4   | 161.5   | 79.7   | 150.3    | 75.8   |
| <b>MCP-1</b>                    | 5     | 1541.7 | 1153.6 | 9969.7        | 2321.0 | 2004.9  | 1688.8 | 4044.3  | 3278.8 | 2944.3  | 2552.6 | 3112.2   | 2872.8 |
| <b>IL-15</b>                    | 40    | ND     | ND     | 89.4          | 15.3   | ND      | ND     | ND      | ND     | ND      | ND     | ND       | ND     |
| <b>IL-5</b>                     | 5     | ND     | ND     | ND            | ND     | ND      | ND     | ND      | ND     | ND      | ND     | ND       | ND     |
| <b>IFN<math>\gamma</math></b>   | 1     | 3.5    | 1.7    | 9.3           | 2.7    | 3.2     | 1.4    | 5.6     | 1.6    | 5.7     | 2.8    | 5.3      | 2.8    |
| <b>IL-1RA</b>                   | 15    | 4988.8 | 1702.6 | 6498.4        | 2015.5 | 4952.7  | 862.0  | 8166.8  | 1551.7 | 7774.8  | 883.4  | 7571.7   | 1193.6 |
| <b>TNF<math>\alpha</math></b>   | 0.5   | ND     | ND     | 49.8          | 36.7   | ND      | ND     | ND      | ND     | ND      | ND     | ND       | ND     |
| <b>IL-2</b>                     | 1     | ND     | ND     | ND            | ND     | ND      | ND     | ND      | ND     | ND      | ND     | ND       | ND     |
| <b>IL-7</b>                     | 10    | 27.4   | 5.0    | 52.2          | 9.1    | 25.9    | 6.2    | 20.2    | 6.1    | 17.4    | 9.3    | 14.5     | 5.7    |
| <b>IP-10</b>                    | 0.5   | 4.3    | 1.0    | 1257.5        | 381.9  | 10.0    | 10.1   | 108.8   | 91.5   | 112.8   | 109.4  | 101.5    | 100.3  |
| <b>IL-2R</b>                    | 20    | 15.6   | 8.7    | 77.1          | 8.0    | 14.8    | 8.0    | 16.2    | 6.6    | 18.4    | 9.4    | 13.6     | 10.1   |
| <b>MIG</b>                      | 5     | ND     | ND     | 27.2          | 10.2   | 13.0    | 25.5   | 27.7    | 56.9   | 30.1    | 70.2   | 31.0     | 69.5   |
| <b>IL-4</b>                     | 1     | ND     | ND     | 1689.3        | 923.3  | ND      | ND     | ND      | ND     | ND      | ND     | ND       | ND     |
| <b>IL-8</b>                     | 5     | 1003.6 | 1019.8 | 2183.9        | 1754.0 | 1188.1  | 1086.5 | 3057.1  | 2267.7 | 1915.4  | 1251.7 | 1891.9   | 1312.2 |
| <b>IFN<math>\alpha</math></b>   | 5     | 25.5   | 11.8   | 153.0         | 28.3   | 28.7    | 14.6   | 44.7    | 16.9   | 46.1    | 33.5   | 46.6     | 29.6   |
| <b>IFN<math>\beta</math></b>    | 11    | ND     | ND     | 36.7          | 9.2    | ND      | ND     | ND      | ND     | 1.8     | 4.8    | ND       | ND     |
| <b>IL-29</b>                    | 57    | 56.9   | 8.6    | 618.3         | 84.3   | 64.9    | 7.5    | 76.4    | 13.3   | 106.1   | 46.3   | 76.4     | 13.3   |
