# Supplementary material for: Zika Virus Antagonizes Type I Interferon Responses during Infection of Human Dendritic Cells
Source: PubMed Central journal article supplement (PMC5289613; doi:10.1371/journal.ppat.1006164), 2017-02-02
Supplement: ppat.1006164.s009.pdf [file ppat.1006164.s009.pdf]

S3 Table

|                 | <b>Monocytes</b>                  |                           |             |           |             |           |                |           |
|-----------------|-----------------------------------|---------------------------|-------------|-----------|-------------|-----------|----------------|-----------|
|                 | <b>Limit of detection (pg/ml)</b> | <b>Unit of expression</b> | <b>Mock</b> |           | <b>LPS</b>  |           | <b>PR-2015</b> |           |
|                 |                                   |                           | <b>Mean</b> | <b>SD</b> | <b>Mean</b> | <b>SD</b> | <b>Mean</b>    | <b>SD</b> |
| <b>IL-1b</b>    | 7.2                               | pg/ml                     | 100.5       | 76.4      | 2372.7      | 1367.5    | 49.9           | 21.9      |
| <b>IL-6</b>     | 2.5                               | ng/ml                     | 2.3         | 0.6       | 23.1        | 6.3       | 2.7            | 0.8       |
| <b>IL-10</b>    | 3.3                               | pg/ml                     | 29.1        | 20.0      | 2077.7      | 1172.2    | 26.3           | 20.4      |
| <b>IL-12p70</b> | 1.9                               | pg/ml                     | 1.5         | 0.7       | 33.2        | 55.9      | 1.3            | 2.0       |
| <b>TNF</b>      | 3.7                               | pg/ml                     | 12.0        | 8.3       | 2227.1      | 1416.5    | 15.5           | 12.4      |
| <b>IFN-a</b>    | 1.5                               | pg/ml                     | -           | -         | -           | -         | -              | -         |
| <b>MCP-1</b>    | 2.7                               | ng/ml                     | 26.3        | 16.1      | 23.8        | 12.6      | 33.5           | 12.2      |
| <b>Rantes</b>   | 1.0                               | pg/ml                     | 57.6        | 63.9      | 399.2       | 299.7     | 51.9           | 47.8      |
| <b>IL-8</b>     | 0.2                               | ng/ml                     | 67.3        | 44.1      | 172.4       | 27.0      | 81.4           | 37.4      |
| <b>MIG-1</b>    | 2.5                               | pg/ml                     | 133.2       | 156.2     | 473.8       | 409.8     | 591.9          | 681.0     |
| <b>IP-10</b>    | 2.8                               | pg/ml                     | 58.7        | 32.5      | 22.1        | 40.7      | 21.0           | 10.7      |
