# Supplementary material for: Zika Virus Antagonizes Type I Interferon Responses during Infection of Human Dendritic Cells
Source: PubMed Central journal article supplement (PMC5289613; doi:10.1371/journal.ppat.1006164), 2017-02-02
Supplement: ppat.1006164.s010.pdf [file ppat.1006164.s010.pdf]

S4 Table

|                 | Myeloid DCs                |                    |      |      |       |       |         |       |
|-----------------|----------------------------|--------------------|------|------|-------|-------|---------|-------|
|                 | Limit of detection (pg/ml) | Unit of expression | Mock |      | LPS   |       | PR-2015 |       |
|                 |                            |                    | Mean | SD   | Mean  | SD    | Mean    | SD    |
| <b>IL-1b</b>    | 7.2                        | pg/ml              | 5.0  | 5.1  | 19.8  | 5.3   | 10.5    | 9.5   |
| <b>IL-6</b>     | 2.5                        | ng/ml              | 0.0  | 0.0  | 1.4   | 1.1   | 0.2     | 0.3   |
| <b>IL-10</b>    | 3.3                        | pg/ml              | 1.9  | 2.5  | 20.5  | 10.6  | 6.0     | 12.0  |
| <b>IL-12p70</b> | 1.9                        | pg/ml              | 1.9  | 2.0  | 15.7  | 9.2   | 2.2     | 0.9   |
| <b>TNF</b>      | 3.7                        | pg/ml              | 9.7  | 4.8  | 62.4  | 28.9  | 19.6    | 6.8   |
| <b>IFN-a</b>    | 1.5                        | pg/ml              | -    | -    | -     | -     | -       | -     |
| <b>MCP-1</b>    | 2.7                        | ng/ml              | 6.0  | 4.8  | 6.7   | 3.5   | 17.6    | 16.0  |
| <b>Rantes</b>   | 1.0                        | pg/ml              | 7.6  | 4.1  | 108.8 | 103.7 | 17.1    | 13.9  |
| <b>IL-8</b>     | 0.2                        | ng/ml              | 3.3  | 1.8  | 13.4  | 6.8   | 7.3     | 2.9   |
| <b>MIG-1</b>    | 2.5                        | pg/ml              | 77.7 | 99.8 | 361.9 | 368.1 | 369.2   | 470.4 |
| <b>IP-10</b>    | 2.8                        | pg/ml              | 4.8  | 4.4  | 32.9  | 22.9  | 78.1    | 58.0  |
