# Supplementary material for: Zika Virus Antagonizes Type I Interferon Responses during Infection of Human Dendritic Cells
Source: PubMed Central journal article supplement (PMC5289613; doi:10.1371/journal.ppat.1006164), 2017-02-02
Supplement: ppat.1006164.s011.pdf [file ppat.1006164.s011.pdf]

S5 Table

|                 | Plasmacytoid DCs           |                    |       |      |         |        |         |       |
|-----------------|----------------------------|--------------------|-------|------|---------|--------|---------|-------|
|                 | Limit of detection (pg/ml) | Unit of expression | Mock  |      | R848    |        | PR-2015 |       |
|                 |                            |                    | Mean  | SD   | Mean    | SD     | Mean    | SD    |
| <b>IL-1b</b>    | 7.2                        | pg/ml              | 4.7   | 5.9  | 3.0     | 1.7    | 24.6    | 25.6  |
| <b>IL-6</b>     | 2.5                        | ng/ml              | 4.2   | 4.1  | 271.6   | 141.1  | 273.3   | 351.1 |
| <b>IL-10</b>    | 3.3                        | pg/ml              | 3.4   | 5.2  | 0.2     | 0.3    | 16.6    | 7.6   |
| <b>IL-12p70</b> | 1.9                        | pg/ml              | 2.8   | 2.9  | 5.0     | 3.4    | 6.3     | 6.6   |
| <b>TNF</b>      | 3.7                        | pg/ml              | 31.2  | 19.0 | 1087.4  | 885.7  | 53.2    | 38.8  |
| <b>IFN-a</b>    | 1.5                        | pg/ml              | 6.9   | 2.8  | 13059.4 | 8911.5 | 76.6    | 59.6  |
| <b>MCP-1</b>    | 2.7                        | ng/ml              | 3.2   | 2.8  | 9.5     | 7.2    | 28.8    | 30.4  |
| <b>Rantes</b>   | 1.0                        | pg/ml              | 3.3   | 3.3  | 260.9   | 170.6  | 7.9     | 3.9   |
| <b>IL-8</b>     | 0.2                        | ng/ml              | 0.3   | 0.3  | 2.3     | 1.7    | 0.4     | 0.2   |
| <b>MIG-1</b>    | 2.5                        | pg/ml              | 103.2 | 82.5 | 1479.1  | 1977.1 | 238.3   | 298.8 |
| <b>IP-10</b>    | 2.8                        | pg/ml              | 4.1   | 3.2  | 1136.1  | 877.8  | 51.2    | 55.3  |
